# Supplementary material for: Efficacy and Safety of Immune Checkpoint Inhibitor Rechallenge in the Treatment of Esophageal Squamous Cell Cancer
Source: PubMed Central journal article supplement (PMC11705047; doi:10.7150/jca.104380), 2025-01-01
Supplement: jcav16p0943s1.pdf [file jcav16p0943s1.pdf]

Supplementary Table 1. Treatment discontinuation caused by treatment-related adverse events.

|                                      | R(n=211) | NR(n=118) |
|--------------------------------------|----------|-----------|
| Anemia                               | 2(0.9%)  | 2(1.7%)   |
| Diarrhea/colitis                     | 2(0.9%)  | 0         |
| Pneumonitis                          | 1(0.5%)  | 0         |
| Creatinine renal clearance decreased | 1(0.5%)  | 1(0.8%)   |
| Hypersensitivity                     | 1(0.5%)  | 0         |
| Neurotoxicity                        | 2(0.9%)  | 0         |
| Asthenia                             | 2(0.9%)  | 1(0.8%)   |
| Diarrhea                             | 2(0.9%)  | 0         |
| Hematemesis                          | 1(0.5%)  | 0         |
| Hypoesthesia                         | 1(0.5%)  | 0         |
| Platelet count decreased             | 0        | 1(0.8%)   |
| Decreased appetite                   | 0        | 1(0.8%)   |
| Neutrophil count decreased           | 0        | 1(0.8%)   |
| White blood cell count decreased     | 0        | 1(0.8%)   |
| Total                                | 15(7.1%) | 8(6.8%)   |
